# Supplementary material
Source: PubMed Central journal article supplement (PMC7594103)
Supplement: NIHMS868975-supplement-supplemental.pdf [file NIHMS868975-supplement-supplemental.pdf]

## Supporting Information

### Phonon Anharmonicity in Bulk $T_d$ -MoTe<sub>2</sub>

Jaydeep Joshi,<sup>1</sup> Iris Stone,<sup>1</sup> Ryan Beams,<sup>2</sup> Sergiy Krylyuk,<sup>2</sup> Irina Kalish,<sup>2</sup> Albert Davydov,<sup>2</sup> and Patrick Vora<sup>1,a)</sup>

1) Department of Physics and Astronomy, George Mason University, Fairfax, VA 22030, USA.

2) Material Measurement Laboratory, National Institute of Standards and Technology, Gaithersburg, MD 20899, USA

a) Electronic mail: pvora@gmu.edu

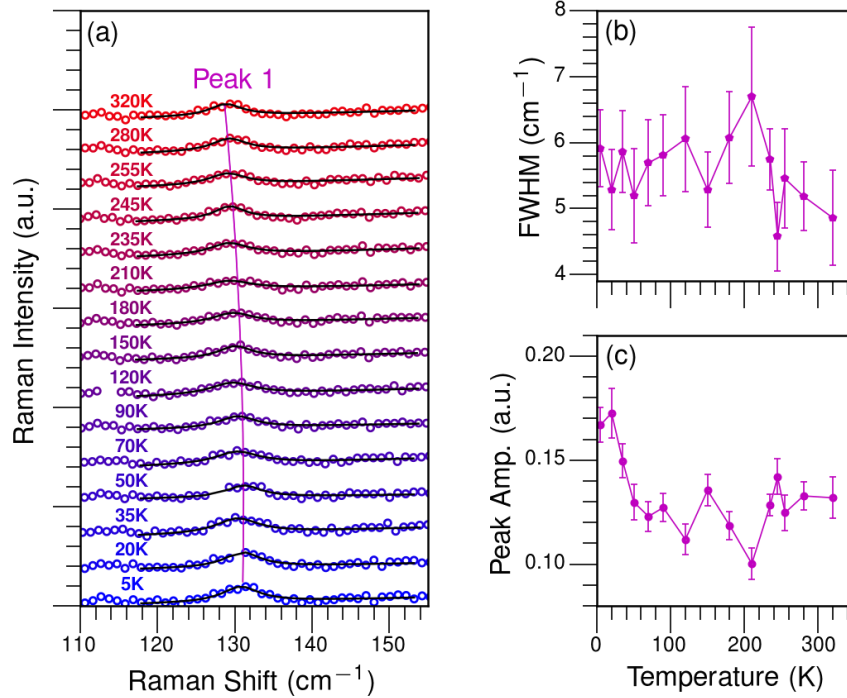

**Figure S1** a) Temperature-dependent Raman spectra for Peak 1 normalized by the intensity of Peak 2 as labelled in Figure 1c. Solid black lines represent single Lorentzian fits with a linear background. b) FWHM of Peak 1 extracted from the fits at each temperature. c) Amplitudes of Peak 1, extracted from the fits in (a).  $1\sigma$  error bars are included.

#### Raman Mode Assignment

Raman experiments in a backscattering geometry are sensitive to modes with  $A_g$  and  $B_g$  symmetry for the  $IT'$  phase and with  $A_l$  and  $B_l$  symmetries in the  $T_d$  phase.<sup>1</sup> In polarization-dependent Raman measurements of  $IT'$ -MoTe<sub>2</sub>, which will be reported elsewhere, we have determined that Peaks 1-4 are of  $A_g$  symmetry. We now argue that these  $A_g$  modes evolve into  $A_1$  modes in  $T_d$ -MoTe<sub>2</sub> based upon the similarity of their Raman tensors. The tensors for  $A_g$  and  $A_1$  symmetry Raman modes are<sup>1</sup>

$$\vec{R}_{A_g} = \begin{pmatrix} a & d & 0 \\ d & b & 0 \\ 0 & 0 & c \end{pmatrix} \quad \vec{R}_{A_1} = \begin{pmatrix} a & 0 & 0 \\ 0 & b & 0 \\ 0 & 0 & c \end{pmatrix}. \quad (\text{S1})$$

The Raman cross-section  $S$  can be calculated from<sup>2</sup>

$$S = |\hat{e}_s \cdot \vec{R} \cdot \hat{e}_i|^2 \quad (\text{S2})$$

where  $\hat{e}_i$  and  $\hat{e}_s$  are unit vectors for the polarization of the incident and scattered photons. In our experiment the excitation and collection paths are collinear and perpendicular to the basal plane of MoTe<sub>2</sub> (a backscattering geometry). The laser is polarized at an arbitrary angle  $\theta$  with respect to the  $a$  crystal axis and  $\phi$  is the polarization angle of the scattered light with respect to the same axis.  $\phi=\theta$  and  $\phi=\theta + \frac{\pi}{2}$  correspond to parallel and perpendicular collection configuration respectively. Therefore,

$$\hat{e}_i = (\sin \theta \quad 0 \quad \cos \theta), \quad (\text{S3})$$

$$\hat{e}_s = (\sin \phi \quad 0 \quad \cos \phi). \quad (\text{S4})$$

We now evaluate Eq. S2 for  $A_g$  symmetry modes using Eq. S3 and Eq. S4

$$S_{A_g} = \left| (\sin \phi \quad 0 \quad \cos \phi) \begin{pmatrix} a & d & 0 \\ d & b & 0 \\ 0 & 0 & c \end{pmatrix} \begin{pmatrix} \sin \theta \\ 0 \\ \cos \theta \end{pmatrix} \right|^2 \quad (\text{S5a})$$

$$= \left| (\sin \phi \quad 0 \quad \cos \phi) \begin{pmatrix} a \sin \theta \\ d \sin \theta \\ c \cos \theta \end{pmatrix} \right|^2 \quad (\text{S5b})$$

$$= |a \sin \theta \sin \phi + c \cos \theta \cos \phi|^2. \quad (\text{S5c})$$

We can perform a similar calculation for the  $A_1$  symmetry mode

$$S_{A_1} = \left| (\sin \phi \quad 0 \quad \cos \phi) \begin{pmatrix} a & 0 & 0 \\ 0 & b & 0 \\ 0 & 0 & c \end{pmatrix} \begin{pmatrix} \sin \theta \\ 0 \\ \cos \theta \end{pmatrix} \right|^2 \quad (\text{S6a})$$

$$= \left| (\sin \phi \quad 0 \quad \cos \phi) \begin{pmatrix} a \sin \theta \\ 0 \\ c \cos \theta \end{pmatrix} \right|^2 \quad (\text{S6b})$$

$$= |a \sin \theta \sin \phi + c \cos \theta \cos \phi|^2. \quad (\text{S6c})$$

Equations S5c and S6c are identical which, when combined with the continuous evolution of each mode with temperature, suggests that  $A_g$  modes will evolve into  $A_1$  modes at low temperature.

A similar analysis can be performed for the  $B_g$  and  $B_1$  symmetry Raman tensors

$$\vec{R}_{B_g} = \begin{pmatrix} 0 & 0 & f \\ 0 & 0 & g \\ f & g & 0 \end{pmatrix} \quad \vec{R}_{B_1} = \begin{pmatrix} 0 & 0 & f \\ 0 & 0 & 0 \\ f & 0 & 0 \end{pmatrix}. \quad (\text{S7})$$

Following the same approach, we find

$$S_{B_g} = \left| (\sin \phi \quad 0 \quad \cos \phi) \begin{pmatrix} 0 & 0 & f \\ 0 & 0 & g \\ f & g & 0 \end{pmatrix} \begin{pmatrix} \sin \theta \\ 0 \\ \cos \theta \end{pmatrix} \right|^2 = |f|^2 (\sin(\theta + \phi))^2, \quad (\text{S8})$$

$$S_{B_1} = \left| (\sin \phi \quad 0 \quad \cos \phi) \begin{pmatrix} 0 & 0 & f \\ 0 & 0 & 0 \\ f & 0 & 0 \end{pmatrix} \begin{pmatrix} \sin \theta \\ 0 \\ \cos \theta \end{pmatrix} \right|^2 = |f|^2 (\sin(\theta + \phi))^2. \quad (\text{S9})$$

Equations S8 and S9 are identical which, when combined with the continuous evolution of this mode with temperature, suggests that  $B_g$  modes will evolve into  $B_1$  modes at low temperature.

### **Supplementary References**

<sup>1</sup> M.I. Aroyo, J.M. Perez-Mato, D. Orobengoa, E. Tasci, G. De La Flor, and A. Kirov, Bulg. Chem. Commun. **43**, 183 (2011).

<sup>2</sup> H.B. Ribeiro, M.A. Pimenta, C.J.S. De Matos, R.L. Moreira, A.S. Rodin, J.D. Zapata, E.A.T. De Souza, and A.H. Castro Neto, ACS Nano **9**, 4270 (2015).
